# Supplementary material for: The maize preligule band is subdivided into distinct domains with contrasting cellular properties prior to ligule outgrowth
Source: PubMed Central journal article supplement (PMC10629682; doi:10.1242/dev.201608), 2023-10-30
Supplement: develop-150-201608-s1.pdf [file develop-150-201608-s1.pdf]

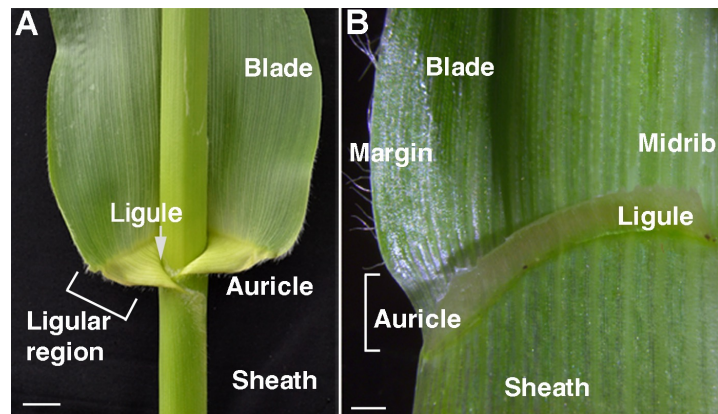

**Fig. S1. Maize leaf structure.**

The maize leaf is composed of a distal blade and proximal sheath separated at the ligular region (bracket), consisting of a ligule and auricle. Scale bar = 2 cm. (B) The leaf is cut at the midrib to expose the adaxial view of the ligular region. Scale bar = 1 mm.

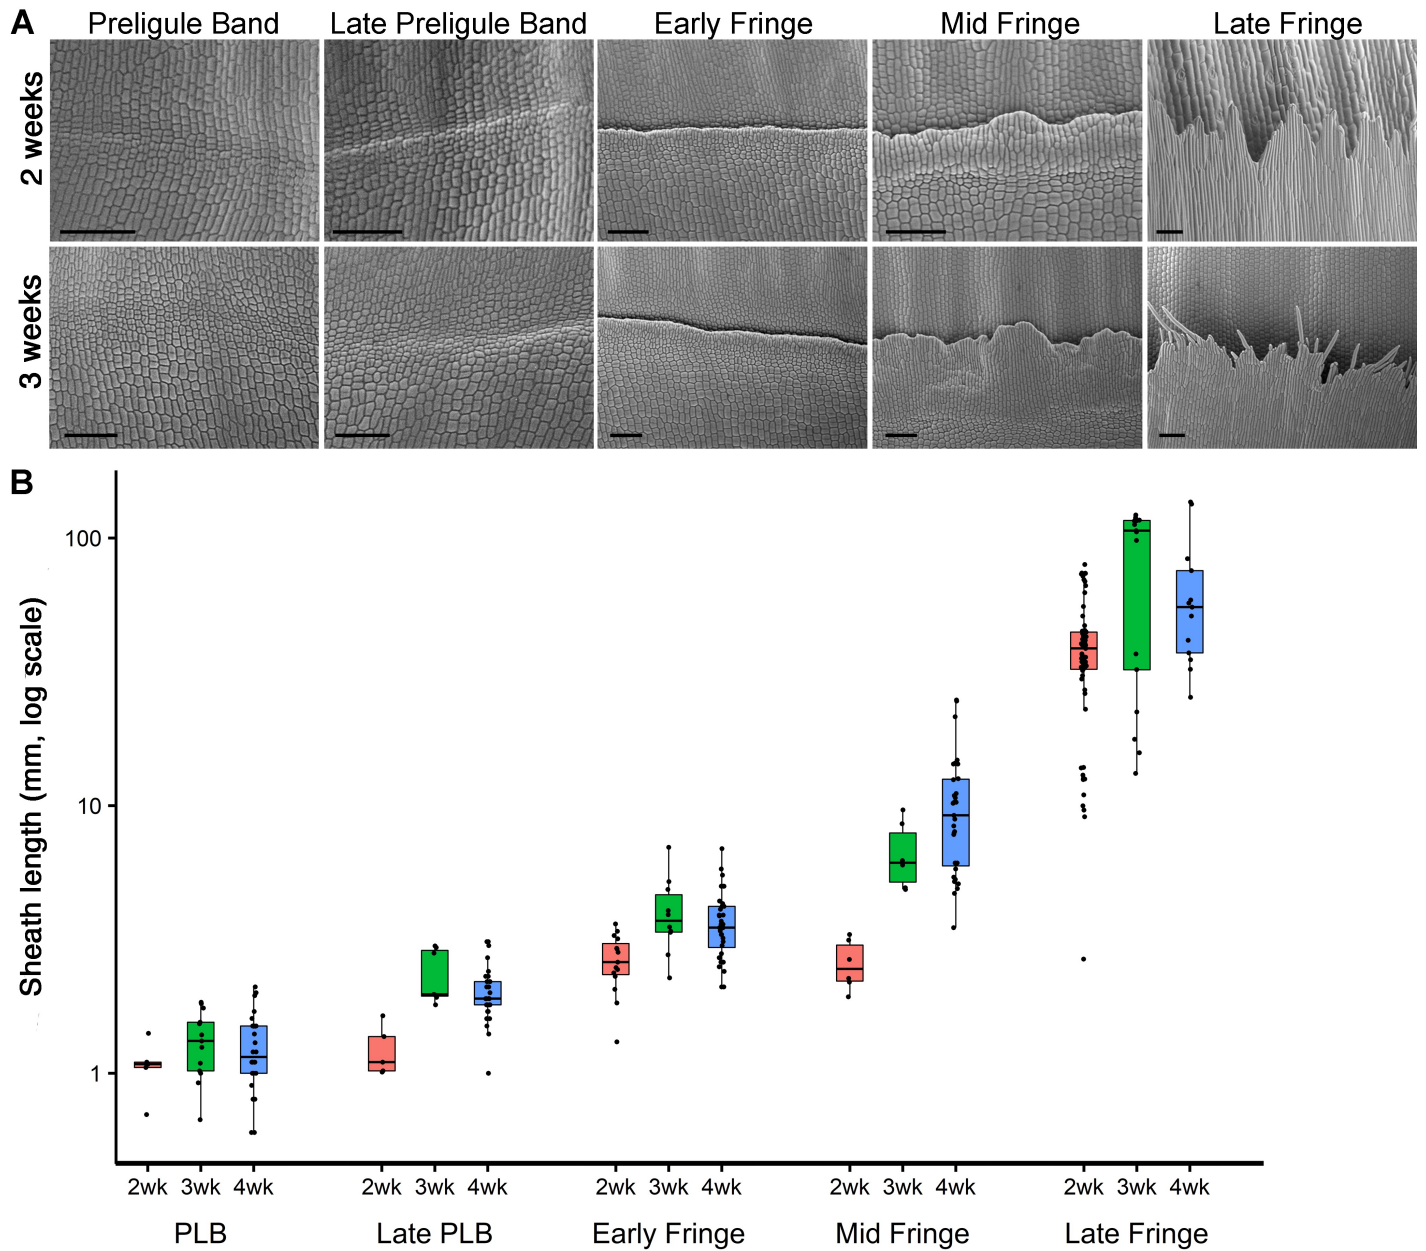

**Fig. S2. Stages of ligule development relative to sheath height in 2-, 3-, and 4-week-old plants.**

Scanning electron micrographs of sequentially dissected leaves of 2- and 3-week-old maize plants. (B) Stages of ligule development in 2-, 3-, and 4-week-old maize plants relative to sheath length. Scale bar = 100  $\mu$ m.

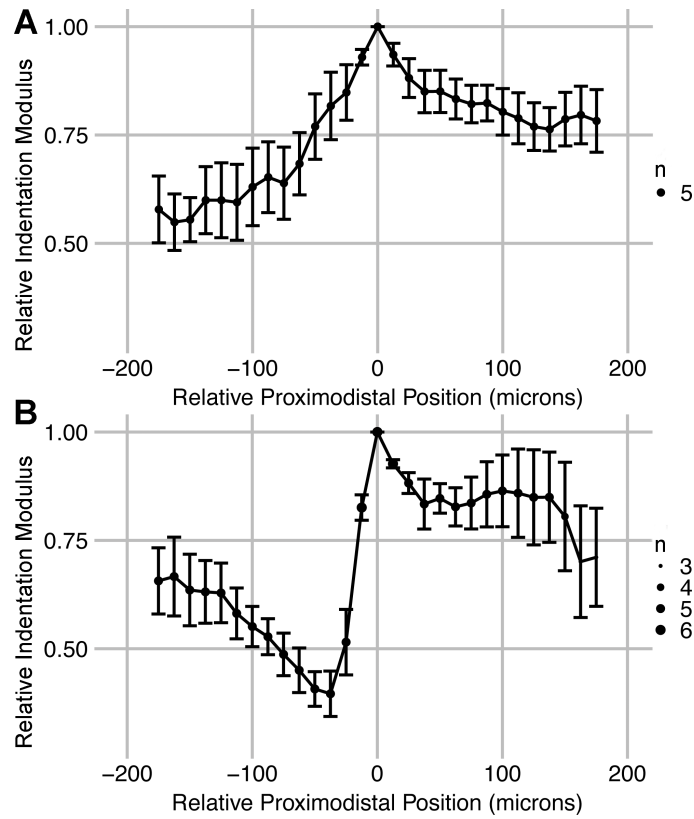

**Fig. S3. AFM force mapping sliding window analysis of Mo17 leaves.**

Sliding window regional averages in IM. Data normalized to the local maximum in the PLB, set as position=0, relative IM=1. Top panel is the average of all Mo17 plants (n=5) exhibiting the early mechanical pattern. Bottom panel is the average of all Mo17 plants (n=6) exhibiting the late mechanical pattern. Error bars indicate standard error.

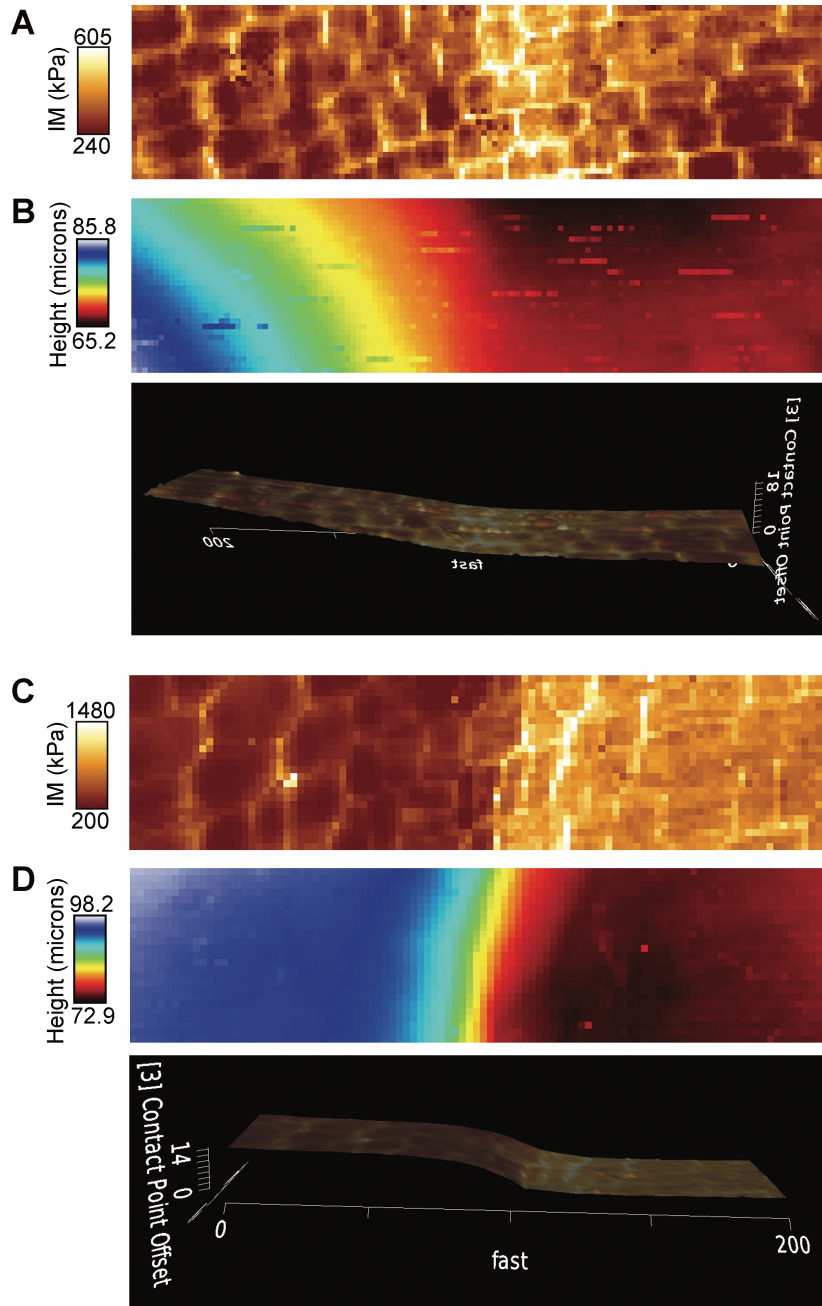

**Fig. S4. Mechanical transition within PLB relative to topography.**

(A) AFM scan of a leaf in the PLB stage, sheath length 0.6mm. Resolution is 1.6  $\mu\text{m}$  per pixel. (B) Topography of the same sample as (A). This height map was first normalized along the mediolateral axis to highlight topography in the proximodistal direction. Height portrayed via both heatmap and 3D projection (C) AFM scan of a leaf in the late PLB stage, sheath length 2.0mm. Resolution is 2.0  $\mu\text{m}$  per pixel. (D) Topography of the same sample as (C). Scale bars = 50  $\mu\text{m}$ .

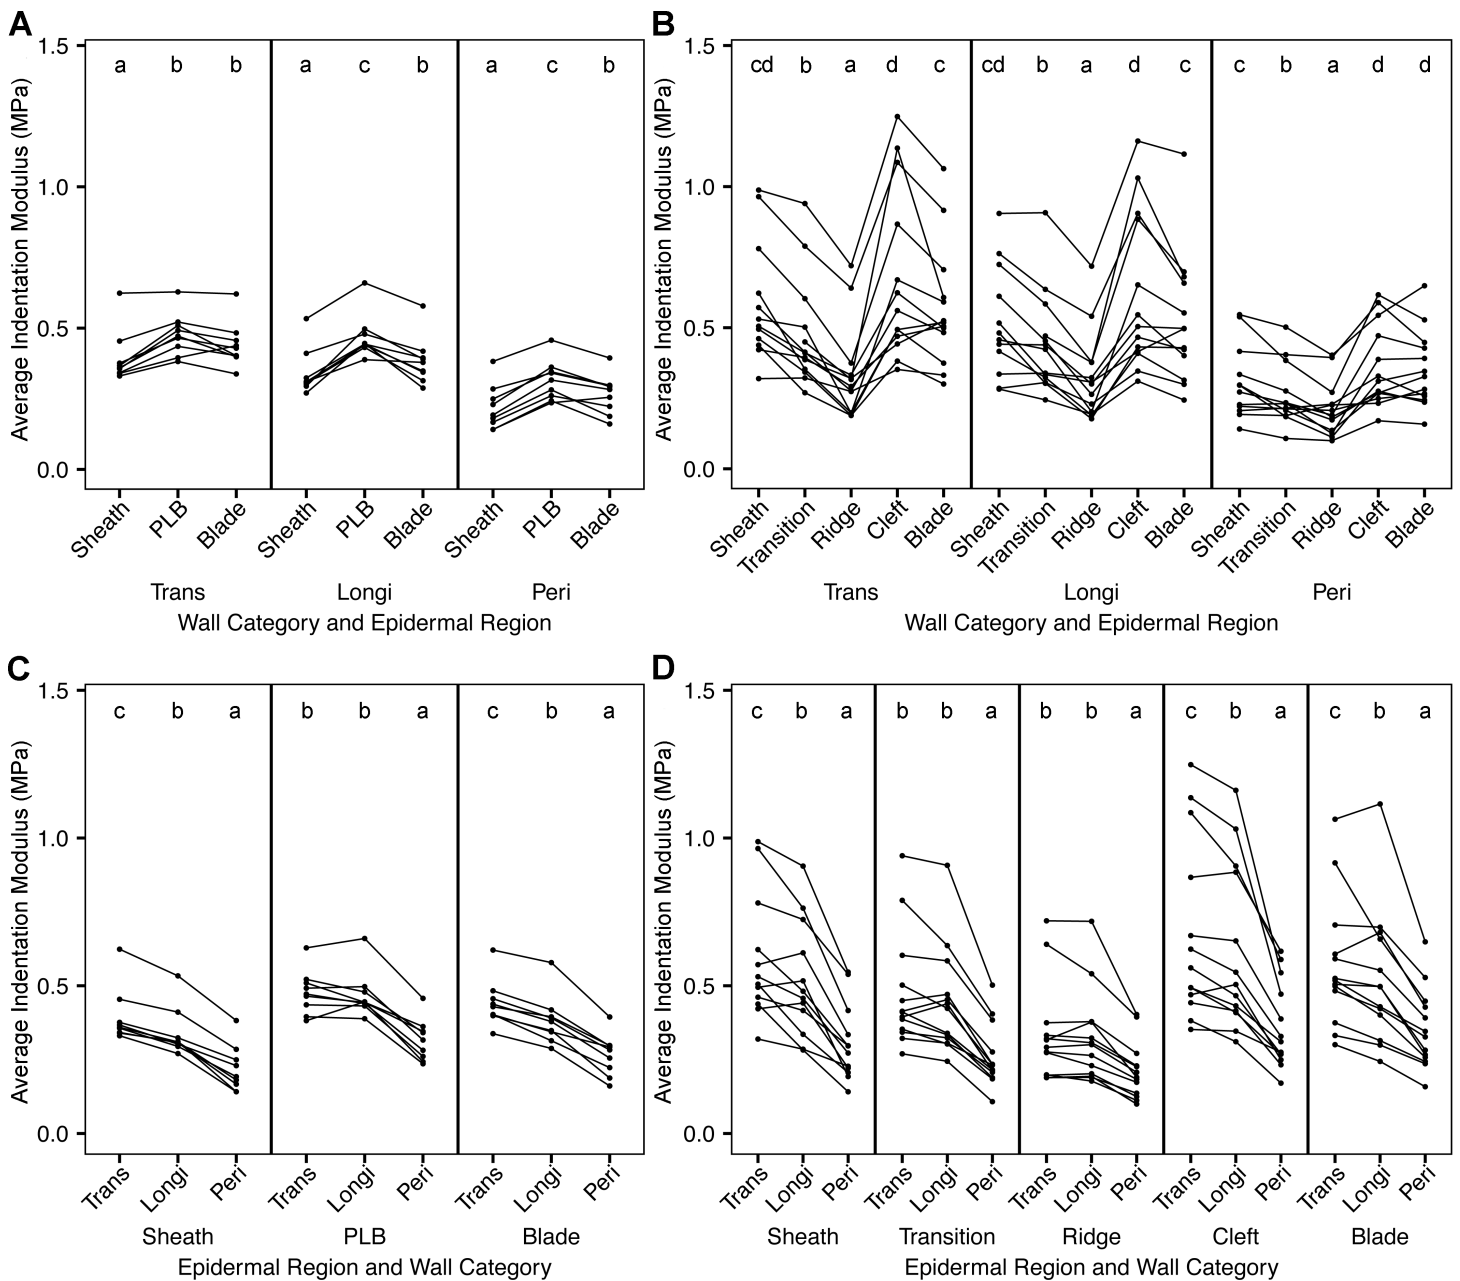

**Fig. S5. Manual resampling reveals regional and subcellular patterns in IM.**

IM was resampled for each wall category in each epidermal region of each sample. Samplings from different wall categories or tissue zones in the same leaf are connected with lines. Each dot indicates the average IM of at least 50 indentations from a particular wall category in a particular epidermal zone in one leaf. (A) All early-stage B73 samples, grouped by epidermal zone. (B) All late-stage B73 samples, grouped by epidermal zone. (C,D) Same data but instead grouped by wall category. Statistical analysis was performed independently for each panel and subpanel. Statistical significance was determined via Kruskal-Wallis test followed by pairwise Wilcoxon signed rank tests using the  $W$ -value at an alpha of  $p < 0.05$ .

**Table S1. Cell division orientation during ligule developmental stages**

Statistical differences for cell division % were determined by MANOVA testing for an effect of developmental stage and division orientation on % divisions, followed by one-way ANOVAs testing for differences with respect to stage and orientation separately. Latin letters indicate significant differences in the % of different division orientations in each stage; Greek letters indicate significant differences for one division type between stages.

| Developmental stage  | n Individual leaves measured per stage | Sheath length range in mm | Cell size ( $\mu\text{m}^2$ +/- S.E.) | Total mitotic cells observed | Anticlinal longitudinal division (% +/- S.E.) | Anticlinal transverse divisions (% +/- S.E.) | Periclinal divisions (% +/- S.E.) | Oblique divisions (% +/- S.E.) |
|----------------------|----------------------------------------|---------------------------|---------------------------------------|------------------------------|-----------------------------------------------|----------------------------------------------|-----------------------------------|--------------------------------|
| Early Preligule band | 4                                      | 0.8 - 1.3                 | 158 +/- 9<br>n=414                    | 77                           | <b>52 +/- 9%</b><br>b<br>$\gamma$             | 49 +/- 8%<br>b<br>$\alpha\beta$              | 0%<br>a<br>$\alpha$               | 3 +/- 2%<br>a<br>$\alpha$      |
| Preligule band       | 3                                      | 1.5 - 2.1                 | 134 +/- 9<br>n=315                    | 59                           | 38 +/- 3%<br>b<br>$\beta\gamma$               | <b>45 +/- 5%</b><br>b<br>$\alpha\beta$       | 10 +/- 4%<br>a<br>$\alpha\beta$   | 5 +/- 3%<br>a<br>$\alpha$      |
| Late Preligule band  | 5                                      | 1.8 - 3.1                 | 105 +/- 6<br>n=759                    | 132                          | 18 +/- 2%<br>b<br>$\alpha\beta$               | 31 +/- 2%<br>c<br>$\alpha$                   | <b>46 +/- 1%</b><br>d<br>$\delta$ | 4 +/- 2%<br>a<br>$\alpha$      |
| Early fringe         | 3                                      | 2.5 - 4.4                 | 186 +/- 16<br>n=304                   | 62                           | 22 +/- 1%<br>b<br>$\alpha\beta$               | <b>48 +/- 1%</b><br>c<br>$\alpha\beta$       | 27 +/- 2%<br>b<br>$\gamma$        | 2 +/- 2%<br>a<br>$\alpha$      |
| Mid fringe           | 3                                      | 5.4 - 12.5                | 450 +/- 145<br>n=539                  | 45                           | 9 +/- 5%<br>a<br>$\alpha$                     | <b>71 +/- 9%</b><br>b<br>$\beta$             | 16 +/- 5%<br>a<br>$\beta\gamma$   | 2 +/- 2%<br>a<br>$\alpha$      |
| Late fringe          | 3                                      | 35.1 - 57.5               | 1511 +/- 147<br>n=246                 | 0                            | n/a                                           | n/a                                          | n/a                               | n/a                            |

**Table S2. Pairwise comparisons of average IM between epidermal zones via Wilcoxon signed rank test using the *W*-statistic**

| Comparison (Epidermal Tissue Zones) | Wall Category | Average IM Zone 1 +/- s.d. (MPa) | Average IM Zone 2 +/- s.d. (MPa) | <i>W</i> -value | Significance level |
|-------------------------------------|---------------|----------------------------------|----------------------------------|-----------------|--------------------|
| Early Sheath v. Early PLB           | Trans         | 0.394 +/- 0.093                  | 0.478 +/- 0.074                  | 0               | p<0.01             |
|                                     | Longi         | 0.340 +/- 0.082                  | 0.470 +/- 0.077                  | 0               | p<0.01             |
|                                     | Peri          | 0.219 +/- 0.078                  | 0.316 +/- 0.070                  | 0               | p<0.01             |
| Early Sheath v. Early Blade         | Trans         | 0.394 +/- 0.093                  | 0.441 +/- 0.079                  | 1               | p<0.01             |
|                                     | Longi         | 0.340 +/- 0.082                  | 0.384 +/- 0.084                  | 0               | p<0.01             |
|                                     | Peri          | 0.219 +/- 0.078                  | 0.265 +/- 0.069                  | 0               | p<0.01             |
| Early PLB v. Early Blade            | Trans         | 0.478 +/- 0.074                  | 0.441 +/- 0.079                  | 6               | NS                 |
|                                     | Longi         | 0.470 +/- 0.077                  | 0.384 +/- 0.084                  | 0               | p<0.01             |
|                                     | Peri          | 0.316 +/- 0.070                  | 0.265 +/- 0.069                  | 1               | p<0.01             |
| Late Sheath v. Late Transition      | Trans         | 0.591 +/- 0.213                  | 0.475 +/- 0.194                  | 1               | p<0.01             |
|                                     | Longi         | 0.518 +/- 0.196                  | 0.443 +/- 0.180                  | 9               | p<0.05             |
|                                     | Peri          | 0.308 +/- 0.131                  | 0.260 +/- 0.107                  | 5               | p<0.01             |
| Late Sheath v. Late Ridge           | Trans         | 0.591 +/- 0.213                  | 0.332 +/- 0.167                  | 0               | p<0.01             |
|                                     | Longi         | 0.518 +/- 0.196                  | 0.323 +/- 0.156                  | 0               | p<0.01             |
|                                     | Peri          | 0.308 +/- 0.131                  | 0.211 +/- 0.097                  | 7               | p<0.01             |
| Late Sheath v. Late Cleft           | Trans         | 0.591 +/- 0.213                  | 0.679 +/- 0.304                  | 22              | NS                 |
|                                     | Longi         | 0.518 +/- 0.196                  | 0.620 +/- 0.281                  | 18              | NS                 |
|                                     | Peri          | 0.308 +/- 0.131                  | 0.362 +/- 0.146                  | 13              | p<0.05             |
| Late Sheath v. Late Blade           | Trans         | 0.591 +/- 0.213                  | 0.571 +/- 0.218                  | 25              | NS                 |
|                                     | Longi         | 0.518 +/- 0.196                  | 0.524 +/- 0.230                  | 34              | NS                 |
|                                     | Peri          | 0.308 +/- 0.131                  | 0.351 +/- 0.134                  | 13              | p<0.05             |
| Late Transition v. Late Ridge       | Trans         | 0.475 +/- 0.194                  | 0.332 +/- 0.167                  | 0               | p<0.01             |
|                                     | Longi         | 0.443 +/- 0.180                  | 0.323 +/- 0.156                  | 0               | p<0.01             |
|                                     | Peri          | 0.260 +/- 0.107                  | 0.211 +/- 0.097                  | 9               | p<0.01             |

|                               |       |                 |                 |    |        |
|-------------------------------|-------|-----------------|-----------------|----|--------|
| Late Transition v. Late Cleft | Trans | 0.475 +/- 0.194 | 0.679 +/- 0.304 | 0  | p<0.01 |
|                               | Longi | 0.443 +/- 0.180 | 0.620 +/- 0.281 | 0  | p<0.01 |
|                               | Peri  | 0.260 +/- 0.107 | 0.362 +/- 0.146 | 1  | p<0.01 |
| Late Transition v. Late Blade | Trans | 0.475 +/- 0.194 | 0.571 +/- 0.218 | 0  | p<0.01 |
|                               | Longi | 0.443 +/- 0.180 | 0.524 +/- 0.230 | 0  | p<0.01 |
|                               | Peri  | 0.260 +/- 0.107 | 0.351 +/- 0.134 | 0  | p<0.01 |
| Late Ridge v. Late Cleft      | Trans | 0.332 +/- 0.167 | 0.679 +/- 0.304 | 0  | p<0.01 |
|                               | Longi | 0.323 +/- 0.156 | 0.620 +/- 0.281 | 11 | p<0.05 |
|                               | Peri  | 0.211 +/- 0.097 | 0.362 +/- 0.146 | 0  | p<0.01 |
| Late Ridge v. Late Blade      | Trans | 0.332 +/- 0.167 | 0.571 +/- 0.218 | 0  | p<0.01 |
|                               | Longi | 0.323 +/- 0.156 | 0.524 +/- 0.230 | 0  | p<0.01 |
|                               | Peri  | 0.211 +/- 0.097 | 0.351 +/- 0.134 | 0  | p<0.01 |
| Late Cleft v. Late Blade      | Trans | 0.679 +/- 0.304 | 0.571 +/- 0.218 | 12 | p<0.05 |
|                               | Longi | 0.620 +/- 0.281 | 0.524 +/- 0.230 | 7  | p<0.01 |
|                               | Peri  | 0.362 +/- 0.146 | 0.351 +/- 0.134 | 38 | NS     |



**Table S3. Pairwise comparisons of average IM between wall categories via Wilcoxon signed rank test using the *W*-statistic**

| Comparison (Wall Categories)    | Tissue Zone | Category 1 Average IM +/- s.d. (MPa) | Category 2 Average IM +/- s.d. (MPa) | <i>W</i> -value | Significance level |
|---------------------------------|-------------|--------------------------------------|--------------------------------------|-----------------|--------------------|
| Early Timepoint, Trans v. Longi | Sheath      | 0.394 +/- 0.093                      | 0.340 +/- 0.082                      | 0               | p<0.01             |
|                                 | PLB         | 0.478 +/- 0.074                      | 0.470 +/- 0.077                      | 15              | NS                 |
|                                 | Blade       | 0.441 +/- 0.079                      | 0.384 +/- 0.084                      | 0               | p<0.01             |
| Early Timepoint, Trans v. Peri  | Sheath      | 0.394 +/- 0.093                      | 0.219 +/- 0.078                      | 0               | p<0.01             |
|                                 | PLB         | 0.478 +/- 0.074                      | 0.316 +/- 0.070                      | 0               | p<0.01             |
|                                 | Blade       | 0.441 +/- 0.079                      | 0.265 +/- 0.069                      | 0               | p<0.01             |
| Early Timepoint, Longi v. Peri  | Sheath      | 0.340 +/- 0.082                      | 0.219 +/- 0.078                      | 0               | p<0.01             |
|                                 | PLB         | 0.470 +/- 0.077                      | 0.316 +/- 0.070                      | 0               | p<0.01             |
|                                 | Blade       | 0.384 +/- 0.084                      | 0.265 +/- 0.069                      | 0               | p<0.01             |
| Late Timepoint, Trans v. Longi  | Sheath      | 0.591 +/- 0.213                      | 0.518 +/- 0.196                      | 0               | p<0.01             |
|                                 | Transition  | 0.475 +/- 0.194                      | 0.443 +/- 0.180                      | 19              | NS                 |
|                                 | Ridge       | 0.332 +/- 0.167                      | 0.323 +/- 0.156                      | 31              | NS                 |
|                                 | Cleft       | 0.679 +/- 0.304                      | 0.620 +/- 0.281                      | 7               | p<0.01             |
|                                 | Blade       | 0.571 +/- 0.218                      | 0.524 +/- 0.230                      | 16              | p<0.05             |
| Late Timepoint, Trans v. Peri   | Sheath      | 0.591 +/- 0.213                      | 0.308 +/- 0.131                      | 0               | p<0.01             |
|                                 | Transition  | 0.475 +/- 0.194                      | 0.260 +/- 0.107                      | 0               | p<0.01             |
|                                 | Ridge       | 0.332 +/- 0.167                      | 0.211 +/- 0.097                      | 0               | p<0.01             |
|                                 | Cleft       | 0.679 +/- 0.304                      | 0.362 +/- 0.146                      | 0               | p<0.01             |
|                                 | Blade       | 0.571 +/- 0.218                      | 0.351 +/- 0.134                      | 0               | p<0.01             |
| Late Timepoint, Longi v. Peri   | Sheath      | 0.518 +/- 0.196                      | 0.308 +/- 0.131                      | 0               | p<0.01             |
|                                 | Transition  | 0.443 +/- 0.180                      | 0.260 +/- 0.107                      | 0               | p<0.01             |
|                                 | Ridge       | 0.323 +/- 0.156                      | 0.211 +/- 0.097                      | 0               | p<0.01             |
|                                 | Cleft       | 0.620 +/- 0.281                      | 0.362 +/- 0.146                      | 0               | p<0.01             |
|                                 | Blade       | 0.524 +/- 0.230                      | 0.351 +/- 0.134                      | 0               | p<0.01             |

**Table S4. Pairwise comparisons of average IM between early and late mechanical stages via Mann-Whitney U-Test**

| Comparison (Early v Late)    | Wall Category | Average IM Early +/- S.D. (MPa) | Average IM Late +/- S.D. (MPa) | z-score | p-value         |
|------------------------------|---------------|---------------------------------|--------------------------------|---------|-----------------|
| Early Sheath v. Late Sheath  | Transverse    | 0.394 +/- 0.093                 | 0.591 +/- 0.213                | 2.452   | <b>0.014 *</b>  |
|                              | Longitudinal  | 0.340 +/- 0.082                 | 0.518 +/- 0.196                | 2.168   | <b>0.030 *</b>  |
|                              | Periclinal    | 0.219 +/- 0.078                 | 0.308 +/- 0.131                | 1.670   | 0.095           |
| Early PLB v. Late Transition | Transverse    | 0.478 +/- 0.074                 | 0.475 +/- 0.194                | -1.135  | 0.254           |
|                              | Longitudinal  | 0.470 +/- 0.077                 | 0.443 +/- 0.180                | -1.202  | 0.230           |
|                              | Periclinal    | 0.316 +/- 0.070                 | 0.260 +/- 0.107                | -2.003  | <b>0.045 *</b>  |
| Early PLB v. Late Ridge      | Transverse    | 0.478 +/- 0.074                 | 0.332 +/- 0.167                | -2.671  | <b>0.008 **</b> |
|                              | Longitudinal  | 0.470 +/- 0.077                 | 0.323 +/- 0.156                | -2.738  | <b>0.006 **</b> |
|                              | Periclinal    | 0.316 +/- 0.070                 | 0.211 +/- 0.097                | -2.604  | <b>0.009 **</b> |
| Early PLB v. Late Cleft      | Transverse    | 0.478 +/- 0.074                 | 0.679 +/- 0.304                | 1.402   | 0.161           |
|                              | Longitudinal  | 0.470 +/- 0.077                 | 0.620 +/- 0.281                | 0.734   | 0.465           |
|                              | Periclinal    | 0.316 +/- 0.070                 | 0.362 +/- 0.146                | 0.334   | 0.741           |
| Early Blade v. Late Blade    | Transverse    | 0.441 +/- 0.079                 | 0.571 +/- 0.218                | 1.602   | 0.110           |
|                              | Longitudinal  | 0.384 +/- 0.084                 | 0.524 +/- 0.230                | 1.803   | 0.072           |
|                              | Periclinal    | 0.265 +/- 0.069                 | 0.351 +/- 0.134                | 1.269   | 0.204           |

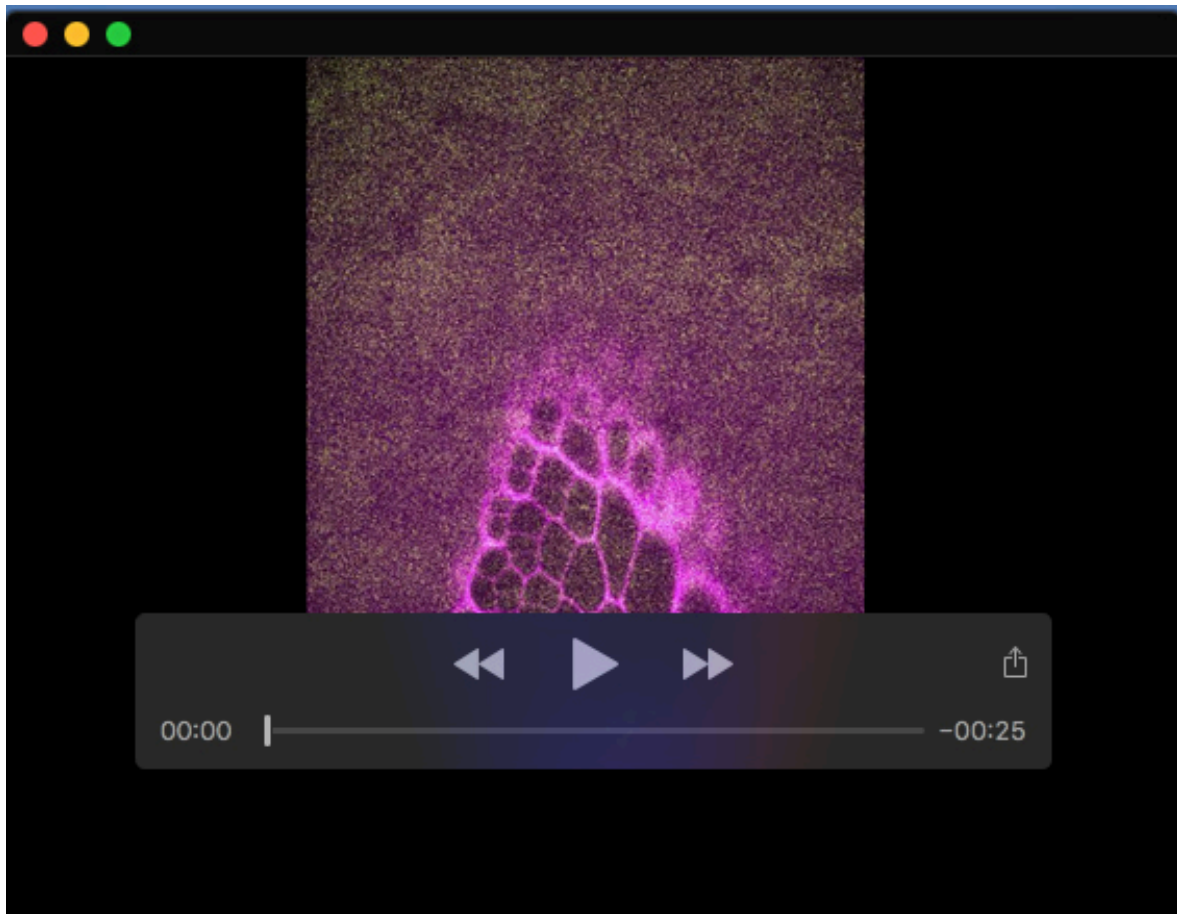

### **Movie 1. Visualizing periclinal cell divisions.**

Leaves from plants expressing TAN-YFP were dissected, stained with propidium iodide (PI), and imaged via confocal microscopy. This movie is made from a sequence of Z-slices from a representative scan. PI is visualized with the magenta channel and TAN-YFP is visualized with the green channel. Periclinally-oriented preprophase bands are visible as green rings running around the circumference of the cell as the focal plane passes through. Two periclinally dividing cells are indicated with arrows.
